## 1       **Responses of Oil Palm Pollinator, *Elaeidobius kamerunicus* to** 2       **Different Concentrations of Estragoles**

3  
4       **Muhammad Fahmi-Halil<sup>1</sup>, Mohamad Haris-Hussain<sup>1</sup>, Razali Mirad<sup>2</sup>, Idris AB<sup>1</sup> and**  
5       **Johari Jalinas<sup>1</sup>**

6  
7       <sup>1</sup>Department of Biological Science and Biotechnology, Faculty of Science and Technology,  
8       Universiti Kebangsaan Malaysia, 43600 Bangi, Selangor, Malaysia.

9       <sup>2</sup>Agrobiodiversity and Environment Research Center, Malaysian Agricultural Research and  
10       Development Institute, 43400, Serdang, Selangor.

11       \*Corresponding author: johari\_j@ukm.edu.my

### 12 13       **ABSTRACT**

14  
15       *Elaeidobius kamerunicus* is the main insect pollinator for oil palm (*Elaeis guineensis*)  
16       worldwide. One of the main reason *E. kamerunicus* attracted to oil palm  
17       inflorescences is estragole, a volatile organic compound released by the oil palm  
18       inflorescences during anthesis stage. However, the amount of estragole released from  
19       the oil palm inflorescence is varied due to the influence of abiotic and biotic factors  
20       and is seen to have an impact on *E. kamerunicus* pollination activity on the oil palm.  
21       To evaluate the responses of *E. kamerunicus*, different types (wild and reared) and sex  
22       (male and female) of *E. kamerunicus* were exposed to different concentrations (1, 5,  
23       10, 30, 50, 70, 100, 150 and 200 ppm) of commercial estragole using four-arm  
24       olfactometer. Results showed that *E. kamerunicus* significantly preferred 100 ppm of  
25       estragole compared to other concentration ( $F = 139.81$ ; d.f. = 9;  $P < 0.05$ ). A  
26       significant interaction was also recorded between estragole concentrations and sexes  
27       of *E. kamerunicus* ( $F = 3.91$ ; d.f. = 9;  $P < 0.05$ ) where male *E. kamerunicus* was found  
28       to be more responsive to 100 ppm of estragole compared female *E. kamerunicus*. The  
29       *E. kamerunicus* responses to estragole is in line with the increase of estragole  
30       concentration up to 100 ppm. However, the response of *E. kamerunicus* was  
31       significantly decreased after the concentration value. The result of this study can be a  
32       good platform for future references since the estragole compound plays a significant  
33       role in oil palm's flower pollination by *E. kamerunicus*. The factor of type and sexes

34 of *E. kamerunicus* did not affect the preferences which indicated that *E. kamerunicus*  
35 reared in the laboratory have the potential to be released into the oil palm plantation  
36 area to overcome the problem of pollination.

37

38 **KEYWORDS:** *Elaeidobius kamerunicus*, estragole, olfactometer, pollination, oil palm.

39

40

## 41 INTRODUCTION

42 Oil palm is one of the important commodity crops that highly dependent on insect  
43 pollinators for reproduction. Interestingly, this plant has a special insect pollinator  
44 (*Elaeidobius kamerunicus*) that only pollinates the oil palm inflorescence  
45 (Setyamidjaja, 2006; Sambathkumar & Ranjith, 2011; Zahari et al., 2019). It was  
46 brought from Cameroon to Malaysia and other countries in the early 80s for release  
47 into the oil palm plantations (Caudwell et al., 2003; Appiah & Agyei, 2013). The  
48 presence of *E. kamerunicus* pollinator has successfully solved the pollination problem  
49 encountered in oil palm plantations over time and has led to an increase in oil  
50 production in most countries such as Malaysia, Indonesia and India (Ponnamma,  
51 1999; Caudwell et al., 2003).

52 One of the factors that causes *E. kamerunicus* pollinators to be attracted to oil palm  
53 is the suitability of palm flowers to serve as a habitat and food source for the insects.  
54 The life cycle of the *E. kamerunicus* pollinator occurs in the oil palm flower where  
55 the eggs, larvae and pupae live inside of the male flower. The adult weevil lives by  
56 feeding and mating around the outside of the flower (Tuo et al., 2011). The presence  
57 of *E. kamerunicus* is also driven by the odor factor of palm flowers released during  
58 the flower anthesis stage. Recent research shows that *E. kamerunicus* pollen tend to  
59 prefer oil palm over other species of palm flowers because they are attracted to the  
60 aromas and odors produced by the oil palm (Corley & Tinker, 2003; Adaiigbe et al.,  
61 2014). Whilst, chemical studies on oil palm flowers have found that the odor produced  
62 by these flowers is due to the volatile compounds of estragole (Anggraeni et al., 2013;  
63 Fahmi et al., 2016).

64 Estragole is one of the volatile organic compounds (VOC) most found in plants,  
65 especially in herbal and aromatic plants (Raffo et al., 2011; Yamani et al., 2014). It  
66 acted as insect attractants for several types of flowering plants such as *Cycas revoluta*,  
67 *Hyssopus officinalis*, *Agastache rugosa* including palm oil (Hiroshi & Masumi, 2006;  
68 Leslie & Richard 2004; Tandon et al., 2001).

69 Although estragole compound have been identified as one of the key factors of *E.*  
70 *kamerunicus* pollinator attraction to oil palm trees (Hussein et al., 1991; Appiah &  
71 Agyei-Dwarko, 2013), studies of the effects of this compound on weevil behaviour  
72 are still less and poorly conducted. Most of *E. kamerunicus* pollinator studies are more  
73 focused on its life cycle and the distribution of this weevil population in the oil palm  
74 plantations. Thus, a study was conducted in the laboratory using commercial estragole  
75 compound to understand the role of this compound in its interaction with *E.*  
76 *kamerunicus* pollinator. The objective of this study was to determine response of the  
77 type (wild and reared) and sex of *E. kamerunicus* pollinator to different concentrations  
78 of estragole compounds.

79

## 80 **MATERIALS AND METHODS**

### 81 **Preparation of *Elaeidobius kamerunicus* adult sample**

82 Study was conducted at the biological control laboratory, Agrobiodiversity and  
83 Environment Research Center, MARDI Serdang. The *E. kamerunicus* samples used  
84 in this study were of Laboratory-Reared and Field-Collected. Sample *E. kamerunicus*  
85 was obtained from MPOB Keratong oil palm plantation, Pahang, Malaysia. Sampling  
86 was done by packing mature male flowers (end stage anthesis) on palm trees using  
87 gauze cloth (Zahari et al. 2019). A total of 1000 samples of these field-collected *E.*  
88 *kamerunicus* were brought to the laboratory and kept at room temperature around 26-  
89 28°C and 12:12 (light :dark) where half of the samples were used in this experiment  
90 and others were kept for breeding to obtain laboratory-reared type of *E. kamerunicus*  
91 (first generation).

92 A total of 500 individuals of male and female *E. kamerunicus* were placed in several  
93 plastic container (16 cm Height x 10 cm Width diameter) for rearing. Each of the  
94 plastic containers was provided with five male flower spikelets (anthesis) as food  
95 sources and breeding sites. After four days, the spikelets were removed and transferred  
96 into another container and left at room temperature until the emergence of new *E.*  
97 *kamerunicus* laboratory-reared adults from the spikelets.

98

### 99 **Preparation of estragole compound solution**

100 The standard estragole compounds used in this study were bought from the company  
101 Sigma-Aldrich, USA. A total of nine series of estragole concentrations were prepared  
102 in this study at 1, 5, 10, 30, 50, 70, 100, 150 and 200 µg / mL where each series was  
103 mixed with hexane solvent (RCILabscan) to obtain a 10 mL mixed solution. To obtain  
104 these series of different estragole concentrations, the standard dilution method ( $M_1V_1$   
105  $= M_2V_2$ ) was used.

106

### 107 **Olfactometric bioassays**

108 Experiment was conducted by using a four-arm olfactometer with a square shape of  
109 107 cm (length) x 107 cm (width) (Toption, China) (Fig. 1). The olfactometer was  
110 divided into two parts. The main part was made of white hard acrylic fiber and covered  
111 with clear thick plastic on top. It consisted of four arms with four opening holes and  
112 one hole in the middle. Each hole opening was fitted with a circular glass flanged with  
113 the end of which has a small open channel for airflow. A glass cylinder containing  
114 charcoal powder was used to absorb the environment lab odors. The hole in the middle  
115 of the device was connected to the suction pump for circulation of air flow inside the  
116 olfactometer section during the experiment.

117 Experimental methods were based on the olfactometer study conducted by Haris-  
118 Hussain et al. (2020) with some modifications. A total of 900 *E. kamerunicus* adults  
119 comprising of field-collected (450 individuals) and laboratory-reared (450

120 individuals) types were used in this study. This experiment was conducted from 09.00  
121 to 17.00 hrs in the biological control laboratory with room temperature of 25-27°C,  
122 60-80% relative humidity (RH) and in illuminated conditions using fluorescent lamps  
123 throughout the experiment. Behavioral assessment for both *E. kamerunicus* type was  
124 conducted separately. Each weevil tested was isolated 12 hours prior the start of the  
125 bioassay experiments. Each assay began by releasing a total of 10 weevils consisting  
126 of five males and females at the center of the olfactory equipment. Each side of this  
127 olfactometer was fitted with a round glass flask filled with cotton that diluted in  
128 different estragole concentration solution (1 ml). *E. kamerunicus* adults in each assay  
129 were exposed to three different series of estragole concentrations (concentrations of 1  
130 ppm, 5 ppm, 10 ppm, control; 30 ppm, 50 ppm, 70 ppm, control; 100 ppm, 150 ppm,  
131 200 ppm, control) with control treatment (no estragole) in each series concentration.  
132 Experiments for each series of estragole concentrations were repeated 15 times  
133 (replicates).

134 Number of individual *E. kamerunicus* responded to estragoles given in  
135 olfactormter was counted. The time given for each assay was 30 minutes. Different *E.*  
136 *kamerunicus* was used once for each experiment. After every assay was completed,  
137 the olfactometer's cover was opened and the glass flasks were swapped with alcohol  
138 to extinguish the trapped odour before starting new assay.

139

#### 140 **Data analyses**

141 To get the percentage of *E. kamerunicus* responded to each treatment, the number of  
142 individual *E. kamerunicus* responded divided by the total number of *E. kamerunicus*  
143 multiply with 100%. Percentage of *E. kamerunicus* responses towards different  
144 estragole concentrations were then transformed using arcsine transformation  
145 ( $\text{ASIN}\sqrt{x}$ ) for statistical analysis. Three-way Analysis of Variance (ANOVA) and  
146 Tukey's mean separation tests were used to analyzed the response of *E. kamerunicus*  
147 (sexes, types) to different estragole concentrations. Turkey's test was used to separate  
148 the treatment means at  $P < 0,05$  in Minitab 16.0.

149 **RESULTS**

150

151 **Interactions among sex, type and estragole concentration factors on *E.***

152 ***kamerunicus* preferences**

153 A three-way ANOVA analysis showed there was no significant interaction among  
154 factors (*E. kamerunicus* sex, type and estragole concentrations) (ANOVA,  $p > 0.05$ )  
155 (Table 1). Only concentration ( $F = 139.81$ ; d.f. = 9;  $p < 0.05$ ) and sex\*concentrations  
156 ( $F = 3.91$ ; d.f. = 9;  $p < 0.05$ ) showed a significant different.

157

158 **Responses of *E. kamerunicus* to different concentrations of estragole**

159 Result shows that *E. kamerunicus* responded significantly more ( $49.5\% \pm 1.7$ )  
160 significantly responded toward a concentration of 100 ppm of estragole compared to  
161 other concentration ( $p < 0.05$ ), (Fig. 2). Interestingly, the mean percentage of *E.*  
162 *kamerunicus* adult individual responded significantly less to 150 and 200 ppm  
163 estragole concentrations. Similar result was observed between 150 ppm and lower  
164 estragole concentrations ( $p > 0.05$ ), similar with between 30 ppm, 10 ppm and 5 ppm  
165 of estragole concentration. The lowest mean percentage of *E. kamerunicus* was  
166 recorded at 1 ppm ( $3.1\% \pm 0.7$ ) and significantly different ( $p < 0.05$ ) among other  
167 estragole concentration except with 5 ppm. However, there were no *E. kamerunicus*  
168 individual recorded in control treatment during this study.

169

170 **Interaction between different sex and concentration factors on *E. kamerunicus***

171 **preferences**

172 The interaction between *E. kamerunicus* sexes and estragole concentrations showed  
173 that male and female of *E. kamerunicus* recorded a significant high mean percentage  
174 of weevils preferences at 100 ppm estragole concentration ( $55.6\% \pm 2.5$ ) and ( $43.3\%$

175  $\pm 2.0$ ) respectively compared to other concentrations ( $p < 0.05$ ) (Fig. 3). The lowest  
176 mean percentage of weevils responded by the weevil was at 1 ppm estragole  
177 concentration ( $3.3\% \pm 1.0$ ) and ( $3.0\% \pm 0.9$  for male and female,) respectively.

178 The interaction results also showed a significant difference between mean  
179 percentage of male and female of *E. kamerunicus* at 200 ppm estragole concentration.  
180 However, there was no significant difference ( $p > 0.05$ ) of mean percentage between  
181 male and female of *E. kamerunicus* at 150 ppm, 70 ppm, 50 ppm, 30 ppm, 5 ppm and  
182 1 ppm estragole concentrations.

183

#### 184 **Effect of types and sexes on *E. kamerunicus* responses to various concentrations** 185 **of estragole.**

186 There was no significant difference in the number of *E. kamerunicus* individual  
187 responded to estragole concentrations (Fig. 4). Similar result was also observed for  
188 types of *E. kamerunicus* (Fig. 5). While for the sex factors of *E. kamerunicus* (Figure  
189 5).

190

## 191 **DISCUSSION**

192 Overall, this study found that *E. kamerunicus* was attracted to estragole compounds  
193 but varied with estragole concentrations tested. These findings are in par with previous  
194 studies showing that estragole compound is one of the key factors for *E. kamerunicus*  
195 to response and attracted to oil palm inflorescence most probably due to the compound  
196 has a strong aroma that *E. kamerunicus* prefers (Hazimah, 1990; Hussein et al., 1991;  
197 Anggraeni et al., 2013; Tandon et al., 2001). This aroma is derived from a benzene  
198 ring found in the structure of estragole, which is found mainly in aromatic plants such  
199 as *Artemisia dracuncululus* L., *Ocimum basilicum* L., and *Agastache rugosa* (Vincenzi  
200 et al. 2000). The results also showed that estragole compound plays an important role  
201 in palm flowering activities and its ability of the compound to attract the presence of  
202 *E. kamerunicus* although no food source was used. This is the main reason why female

203 flower is able to attract *E. kamerunicus* by releasing estragole compound during the  
204 anthesis stage thus allow pollination to take place (Sambathkumar & Ranjith, 2011).

205 The releasing rate of plant-derived organic compounds is strongly influenced by  
206 abiotic and biotic factors (Holopainen & Gershenzon, 2010). This condition is thought  
207 to have an effect on the insects' behaviour, especially those insects that use a sense of  
208 smell to detect food and their partner (Haris et al., 2014). Thus, the exposure of *E.*  
209 *kamerunicus* to different concentrations of estragole compound in this study have  
210 revealed the optimum concentration of estragole compounds in attracting the weevil.  
211 The higher and lower than the 100 ppm concentration of estragole compound only lead  
212 to low *E. kamerunicus* attractions toward the oil palm flowers, probably because the  
213 weevil's sensory function is impaired by high concentration of the compound.  
214 According to Wood (1982), this condition is called 'multiple function' in which the  
215 sensory function of the insect is under stress and disturbance. This is based on a study  
216 of verbenone exposed to bark weevil, *Dendroctonus ponderosae* which, in a high  
217 concentration of compound, makes it difficult and confusing to the weevil's senses to  
218 detect this plant-derived volatile compound.

219 In addition, high concentrations of volatile organic compounds often occur in  
220 plants under stress due to abiotic and biotic factors (Dicke et al., 2009; Holopainen &  
221 Gershenzon, 2010). This condition not only affect the physiology of plants but also  
222 can influence the behaviour of insects where studies have shown that some of the  
223 coleopteran weevil avoid from approaching the plants that release higher  
224 concentration of volatile organic compounds (Jermy et al., 1998; Ikonen, 2002; Heil,  
225 2004). This might be related with the ability of insect sense to identify the quality of  
226 plants based on VOC released, where unhealthy plant normally produced more VOC  
227 than the healthy one (Chittka & Raine, 2006; Schiestl, 2015). However, further studies  
228 need to be carried out in the field to observe the effect of plant-derived organic  
229 compounds on insect's behaviour.

230 Besides, type of *E. kamerunicus* was proved to be a non-significant factor in  
231 affecting the *E. kamerunicus* response towards estragole concentrations in this study.  
232 This probably due to the laboratory-reared *E. kamerunicus* was the first-generation



233 (F1) of field population where they were not significantly different from that of the  
234 field-collected *E. kamerunicus* in genetic or physiological characteristics of the  
235 weevil. Richgels & Rollmann (2012) reported that, insects that have the same genetic  
236 and physiological characters have the same ability to detect VOC released by plants.

237 Interestingly, our results also found that the weevil's sex factor did not  
238 significantly influence *E. kamerunicus*' response to different concentrations of  
239 estragole. This indicates that both sexes of *E. kamerunicus* are able to detect and  
240 respond well to estragole compounds as evidenced as they could easily observed on  
241 both oil palm inflorescences. This feature probably makes *E. kamerunicus* the best  
242 pollinator for oil palm crops since estragole compounds are the major VOCs produced  
243 and released by the palm inflorescence (Misztal et al. 2014; Muhamad Fahmi et al.  
244 2016). This is tend to agree with Farre-Armengol et al. (2015) where they reported the  
245 ability of pollinator insects to detect VOCs produced by flowering plants will help the  
246 insects to determine the flower's location more precisely and rapidly increasing the  
247 process of pollination at once.

248

## 249 CONCLUSION

250 The importance of estragole in guiding the *E. kamerunicus* to pollinate oil  
251 inflorescence is well known since 1980s. However, report on it becoming ineffective  
252 pollinators has been documented by many. We believed it could due to many factors  
253 and estragoles - *E. kamerunicus* relation could one of them. Result of our study  
254 showed that *E. kamerunicus* specifically responded well to 100 ppm estragole  
255 concentrations in the laboratory experiment irrespective of sexes of the weevils. As  
256 we suggested that in order to make *E. kamerunicus* effective pollinator we must create  
257 an environment – biotic and abiotic – that ensure oil palm tree and inflorescence  
258 physiologically able to emitted estragoles around that concentrations in the field  
259 though several factors may involve like soil condition, RH and temperature. Further  
260 studies should be conducted in measuring estragoles emission and *E. kamerunicus*  
261 population density per in spikelets in relation to soil, planting materials, RH and  
262 temperature.

263 **Acknowledgements**

264 The authors would like to thank all the subjects for participating in the study.

265 **Competing interests**

266 The authors declare no competing or financial interests.

267 **Funding**

268 Funding acquisition: Funding was supported by UKM-SIMEDARBY Research ST-  
269 2017-011.

270

271 **References**

272 Adaigbe, V C; Odebiyi, J A; Omoloye, A A; Aisagbonhi, C I and Iyare, O (2014).  
273 Host location and ovipositional preference of *Elaeidobius kamerunicus* on four host  
274 palm species. *J. Hortic. For.*, 1(2): 022-024.

275

276 Anggraeni, T; Rahayu, S; Ahmad, T; Esyanti, R R and Putra, R E (2013). Resources  
277 partitioning and different foraging behavior is the basis for the coexistence of *Thrips*  
278 *hawaiiensis* (Thysanoptera: Thripidae) and *Elaeidobius kamerunicus* (Coleoptera:  
279 Curculionidae) on oil palm (*Elaeis guineensis* Jacq) flower. *J. Entomol. Nematol.*, 5:  
280 59-63.

281

282 Appiah, S O and Agyei-Dwarko, D (2013). Studies on Entomophil pollination towards  
283 sustainable production and increased profitability in the oil Palm: a review. *Elixir*  
284 *Journal.*, 55: 12878-12883.

285

286 Caudwell, R W; Hunt, D; Reid, A; Mensah, B A and Chinchilla, C (2003). Insect  
287 pollination of oil palm – a comparison of the long term viability and sustainability of  
288 *Elaeidobius kamerunicus* in Papua New Guinea, Indonesia, Costa Rica and Ghana.  
289 *ASD Oil Palm Papers.*, 25: 1 - 6.

290

291 Chittka, L and Raine, N E (2006). Recognition of flowers by pollinators. *Curr Opin*  
292 *Plant Biol.*, 9: 428–435.

293

294 Corley, R H V and Tinker, P B (2003). The Oil Palm. Ed ke-4. Blackwell Science.

295

- 296 Dicke, M; Van Loon J J A and Soler R (2009). Chemical complexity of volatiles from  
297 plants induced by multiple attack. *Nat. Chem. Biol.*, 5: 317–324.
- 298
- 299 Fahmi, M M H; Ahmad Bukhary, A K; Norma, H and Idris, A B (2016). Analysis of  
300 volatile organic compound from *Elaeis guineensis* inflorescences planted on different  
301 soil types in Malaysia. *Proceedings of the Universiti Kebangsaan Malaysia, Faculty*  
302 *of Science and Technology 2016 Postgraduate Colloquium*. American Institute of  
303 Physics Inc, 1784.
- 304
- 305 Farré-Armengol, G; Filella, I; Llusia, J and Penuelas, J (2015). Relationships among  
306 floral VOC missions, floral rewards and visits of pollinators in five plant species of a  
307 Mediterranean shrub land. *Plant Ecol. Evol.*, 148 (1): 90–99.
- 308
- 309 Frimpong-Anin, K; Adjaloo, M K; Kwapong, P K and William, O (2014). Structure  
310 and stability of cocoa flowers and their response to pollination. *J. Bot.*, 1-6.
- 311
- 312 Haris-Hussain, M; Kamarudin, N and Azmi, W A (2020). Efficacy of baits for red  
313 palm weevil (RPW), *Rhynchophorus ferrugineus* Olivier under constant laboratory  
314 condition. *J. Oil Palm Res.*, 32(2): 1-22.
- 315
- 316 Haris, M H; Nang, M L S; Chuah, T S and Wahizatul, A A (2014). The efficacy of  
317 synthetic food baits in capturing red palm weevil, *Rhynchophorus ferrugineus*  
318 (Coleoptera:Curculionidae) in campus area of Universiti Malaysia Terengganu.  
319 *Serangga*, 19(1): 59-78.
- 320
- 321 Hazimah, A H (1990). The synthesis and biological activity of some estragole  
322 analogues towards oil palm pollinating weevils, *Elaeidobius kamerunicus* faust. M.Sc.  
323 Thesis, Universiti Putra Malaysia.
- 324
- 325 Heil, M (2004). Direct defence or ecological costs: responses of herbivorous beetles  
326 to volatiles released by wild Lima bean, *Phaseolus lunatus*. *J. Chem. Ecol.*, 30: 1289-  
327 1295.
- 328
- 329 Hiroshi, A and Masumi, K (2006). Estragole (4-allylanisole) is the primary compound  
330 in volatiles emitted from the male and female cones of *Cycas revoluta*. *Int. J. Plant*  
331 *Res.*, 119:671–676.
- 332
- 333 Holopainen, J and Gershenzon, J (2010). Multiple stress factors and the emission of  
334 plant VOCs. *Trends Plant Sci.*, 15: 176-84.

335

336 Hussein, M Y; Lajis, N H and Ali, J H (1991). Biological and chemical factors  
337 associated with the successful introduction of *Elaeidobius kamerunicus* Faust, the oil  
338 palm pollinator in Malaysia, *Acta. Hort.*, 288: 81–87.

339

340 Ikonen, A (2002). Preferences of six leaf beetle species among qualitatively different  
341 leaf age classes of three Salicaceous host species. *Chemoecology.*, 12: 23-28.

342

343 Jermy, T; Szentesi, A and Hovarth, J (1998). Host plant finding in phytophagous  
344 insects – the case of the Colorado potato beetle. *Entomol. Exp. Appl.*, 49: 83-98.

345

346 Kunze, J and Gumbert, A (2001). The combined effect of color and odor on flower  
347 choice behavior of bumble bees in flower mimicry systems. *Behav. Ecol.*, 12(4): 447–  
348 456.

349

350 Leslie, H and Richard, J P (2004). Field capture of northern and western corn  
351 rootworm beetles relative to attractant structure and volatility. *J. Chem. Ecol.*, 30:  
352 1809-1825.

353

354 Misztal, P K; Owen, S M; Guenther, A B; Rasmussen R; Geron, C; Harley, P;  
355 Phillips, G J; Ryan, A; Edwards, D P; Hewitt, C N; Nemitz, E; Siong, J; Heal, M R  
356 and Cape, J N (2010). Large estragole fluxes from oil palms in Borneo. *Atmos. Chem.*  
357 *Phys.*, 1: 4343–4358.

358

359 Nuttman, C and Willmer, P (2003). How does insect visitation trigger floral colour  
360 change? *Ecol. Entomol.*, 28(4): 467-474.

361

362 Ponnamma, K (1999). Diurnal variation in the population of *Elaeidobius kamerunicus*  
363 on the anthesising male inflorescences of oil palm. *The Planter*, 81: 405-410.

364

365 Raffo, A; Nicoli, S and Leclercq, C (2010). Quantification of estragole in fennel herbal  
366 teas: Implications on the assessment of dietary exposure to estragole. *Food Chem.*  
367 *Toxicol.*, 49:370–375.

368

369 Raguso, R A and Willis, M A (2002). Synergy between visual and olfactory cues in  
370 nectar feeding by naive hawkmoths, *Manduca sexta*. *Anim. Behav.*, 64(5): 685-695.

371

- 372 Richgels, P K and Rollmann, S M (2012). Genetic variation in odorant receptors  
373 contributes to variation in olfactory behavior in a natural population of *Drosophila*  
374 *melanogaster*. *Chem. Senses.*, 37: 229-240.
- 375
- 376 Rouslton, T H and Cane, J (2000). Pollen nutritional content and digestibility for  
377 animals. *Plant Syst. Evol.*, 222(1):187-209.
- 378
- 379 Sambathkumar, S and Ranjith, A M (2011). Insect pollinators of oil palm in Kerala  
380 with special reference to African weevil, *Elaeidobius kamerunicus* Faust. *Pest Manag.*  
381 *Hort. Ecosyst.*, 17(1): 14-18.
- 382
- 383 Schiestl, F P (2015). Ecology and evolution of floral volatile-mediated information  
384 transfer in plants. *New Phytol.*, 206(2): 571-577.
- 385
- 386 Setyamidjaja, D (2006). Kelapa Sawit Teknik Budidaya, Panen dan Pengolahan.  
387 Kanisius, Yogyakarta.
- 388 Tandon, R; Manohara, T N; Nijalingappa, B H M and Shivanna, K R (2001).  
389 Pollination and pollen-pistil interaction in oil palm, *Elaeis guineensis*. *Ann. Bot.*, 87:  
390 831–838.
- 391
- 392 Tuo, Y; Koua, H K and Hala, N (2011). Biology of *Elaeidobius kamerunicus* and  
393 *Elaeidobius plagiatus* (Coleoptera: Curculionidae) main pollinators of oil palm in  
394 West Africa. *Eur. J. Sci. Res.*, 3: 426-432.
- 395
- 396 Vincenzi, D M; Silano, M; Maialetti, F and Scazzocchio, B (2000). Constituents of  
397 aromatic plants: II. Estragole. *Fitoterapia.*, 71: 725 – 729.
- 398
- 399 Wood, D L (1982). The role of pheromones, kairomones, and allomones in the host  
400 selection and colonization behavior of bark beetles. *Annu. Rev. Entomol.*, 27: 411-46.
- 401
- 402 Wright, G A and Schiestl, F P (2009). The evolution of floral scent: the influence of  
403 olfactory learning by insect pollinators on the honest signalling of floral rewards.  
404 *Funct. Ecol.*, 23: 841–851.
- 405
- 406 Yamani, H; Mantri, N; Morrison, P D and Edwin, P (2014). Analysis of the volatile  
407 organic compounds from leaves, flower spikes, and nectar of Australian grown,  
408 *Agastache rugosa*. *BMC Complem. Altern. M.*, 14:1-6.
- 409

410 Zahari, S N M; Rusli, R; Haris-Hussain, M and Jalinas, J (2019). Survival rate and  
411 development of larvae *Elaeidobius kamerunicus* (Coleoptera: Curculionidae) on  
412 artificial diets. *Serangga* 24(1): 126-141.  
413  
414

415

## TABLE AND FIGURES

416

417

**Table 1. THREE-WAY ANOVA RESULTS FOR THE STUDY OF *E. kamerunicus* POLLINATOR SUSCEPTIBILITY TO DIFFERENT CONCENTRATIONS OF ESTRAGOLE COMPOUNDS**

418

419

| Source                        | Df   | F-value | P-value       |
|-------------------------------|------|---------|---------------|
| Type of <i>E. kamerunicus</i> | 1    | 2.27    | > 0.05        |
| Sex of <i>E. kamerunicus</i>  | 1    | 0.07    | > 0.05        |
| Concentration of estragole    | 9    | 139.81  | < <b>0.05</b> |
| Type * Sex                    | 1    | 0.24    | > 0.05        |
| Type * Concentration          | 9    | 0.96    | > 0.05        |
| Sex * Concentration           | 9    | 3.91    | < <b>0.05</b> |
| Type * Sex * Concentration    | 9    | 0.93    | > 0.05        |
| Error                         | 1160 |         |               |
| Total                         | 1199 |         |               |

420

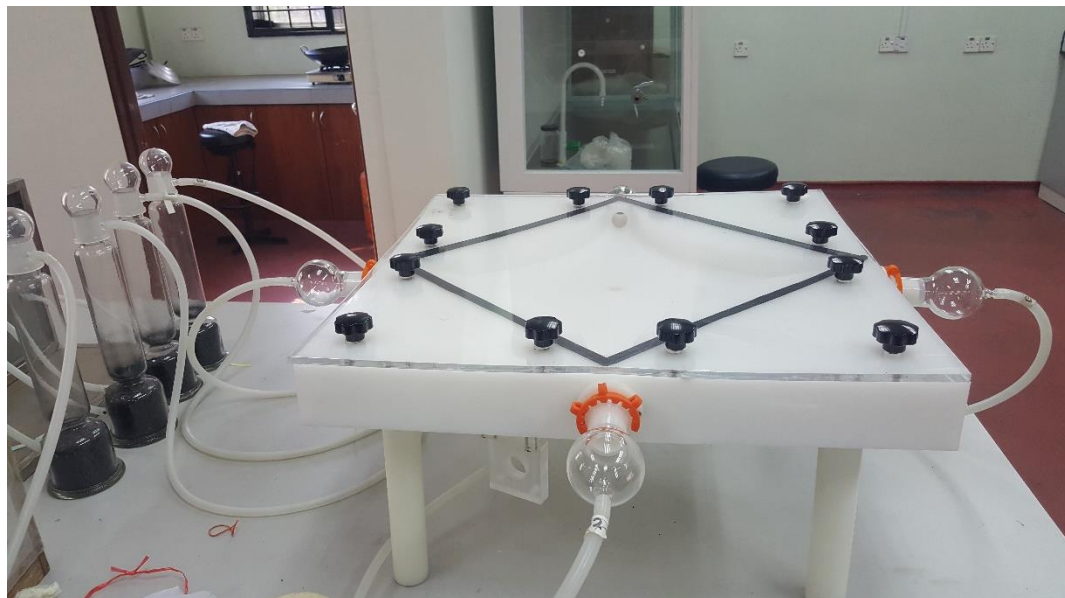

421

422

**Fig. 1.** Four arm olfactometer with glass flask at the end of each arm.

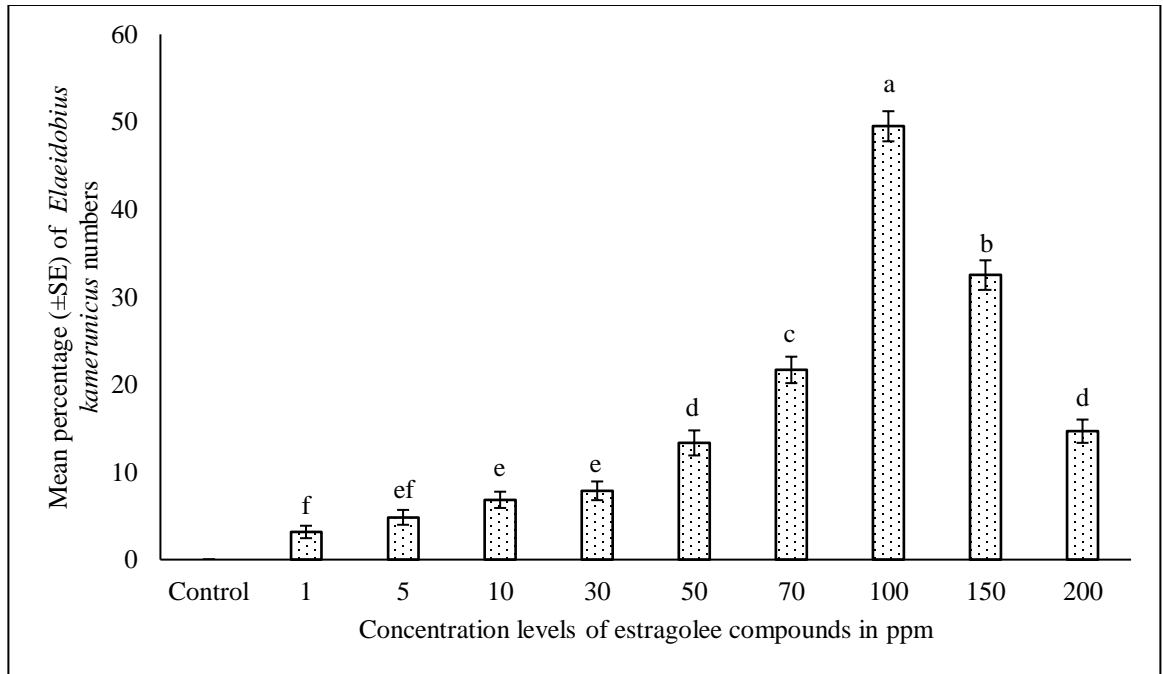

423

424

425

426

**Fig. 2.** Min percentage ( $\pm$  SE) number of weevil *E. kamerunicus* recorded between different concentrations of estragole compounds.

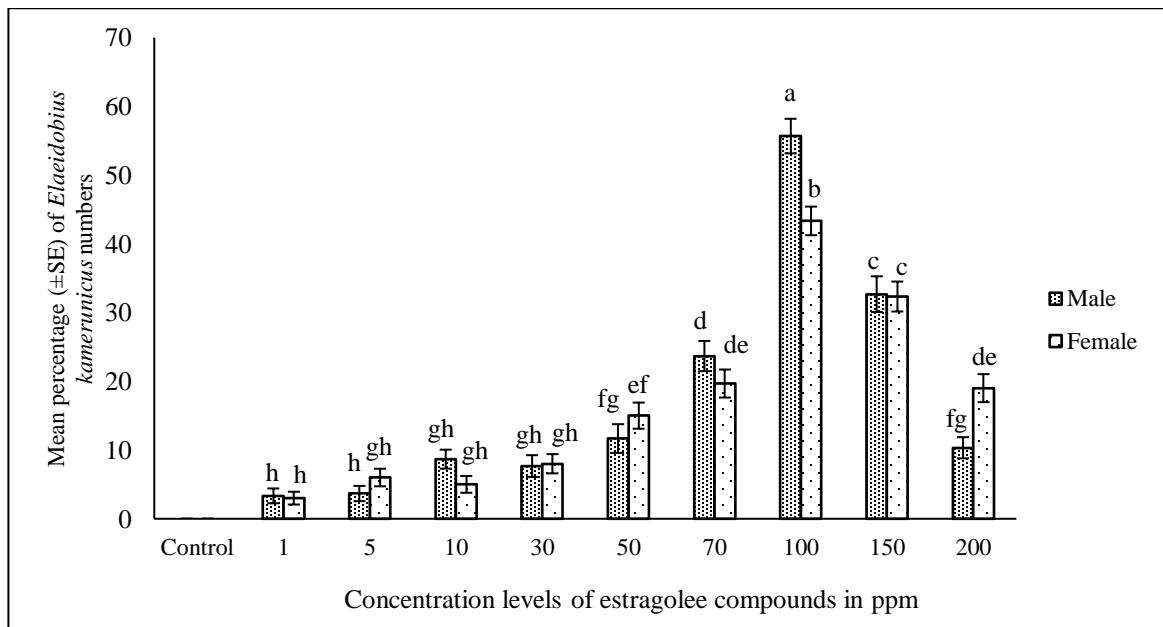

427

428

429

430

431

**Fig. 3.** Min percentage ( $\pm$  SE) of the number of weevil *E. kamerunicus* recorded as a result of interaction between weevil sexes with different concentration of estragole compounds.



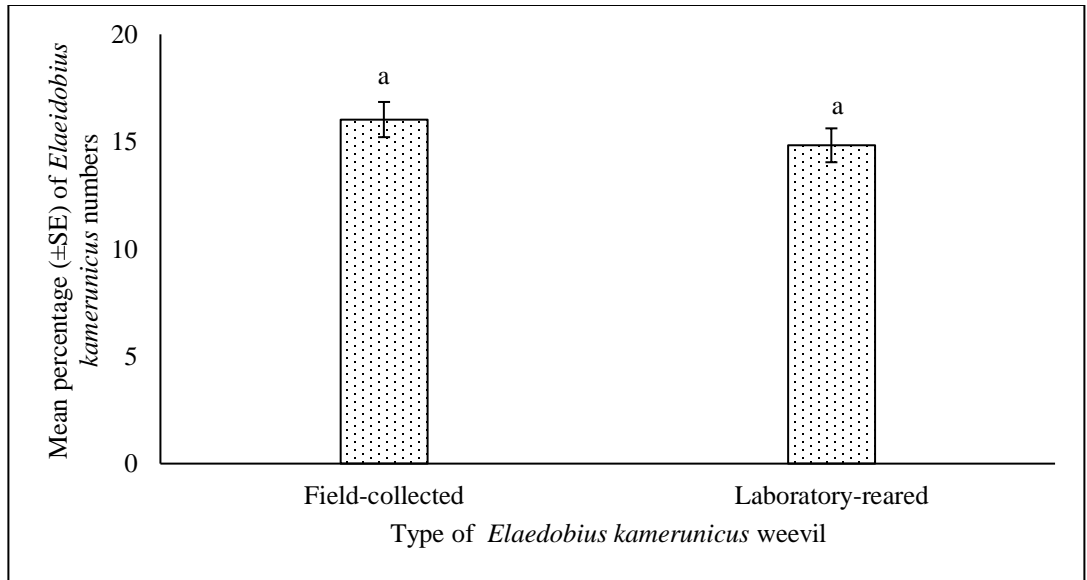

432  
433  
434  
435  
436

**Fig. 4.** Min percentage (± SE) number of weevils between field-collected and laboratory-reared type of *E. kamerunicus*

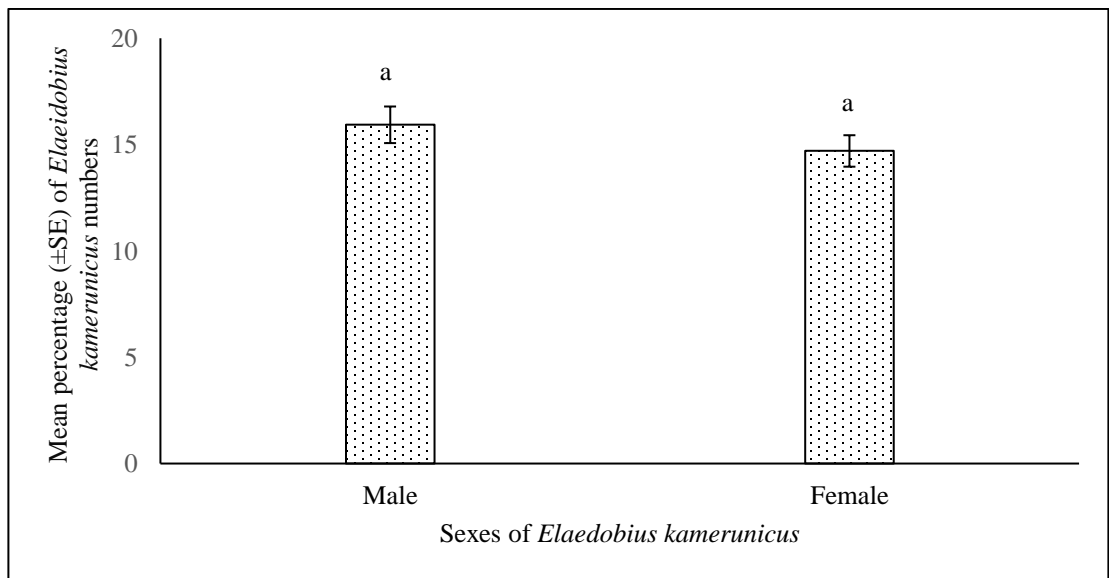

437  
438  
439

**Fig. 5.** Min percentage (± SE) number of weevils between *E. kamerunicus* male and female
